# Supplementary figures and images for: MicroRNA-eQTLs in the developing human neocortex link miR-4707-3p expression to brain size
Source: eLife journal article supplement (doi:10.7554/elife.79488), 2023-01-11

**A**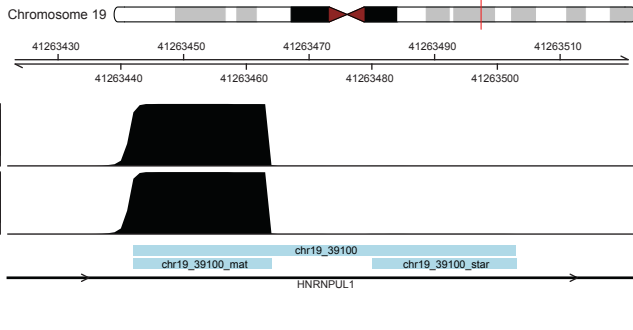**B**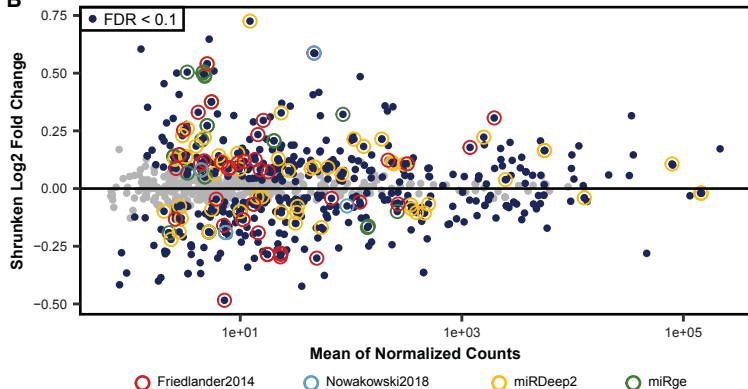

Supplement: supp [file elife-79488-supp-v1.zip]

**A**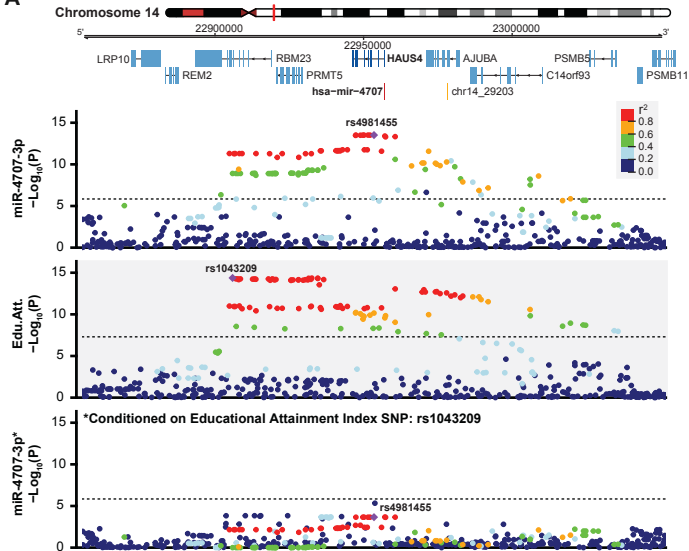**B**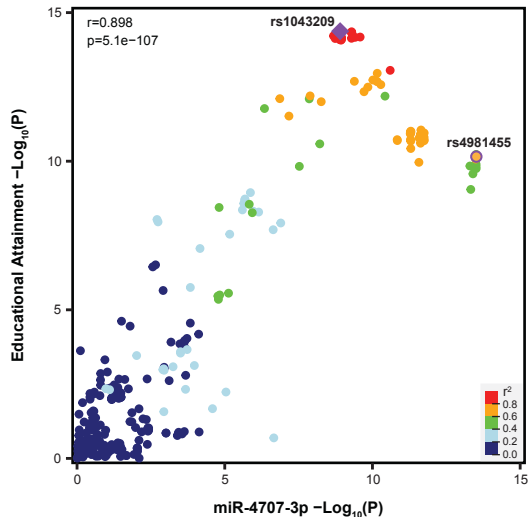

Supplement: supp [file elife-79488-supp-v1.zip]

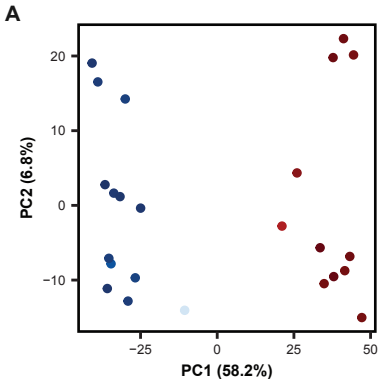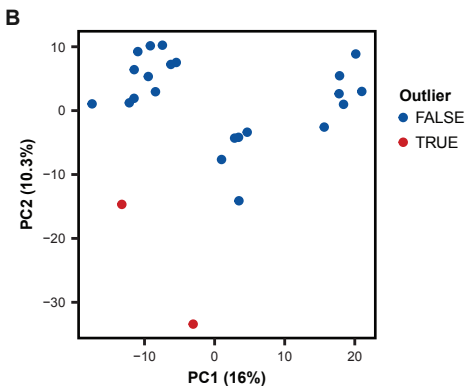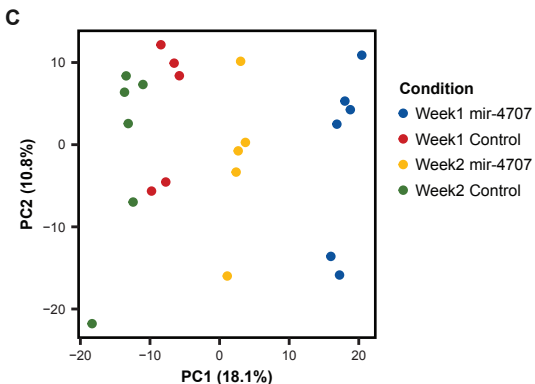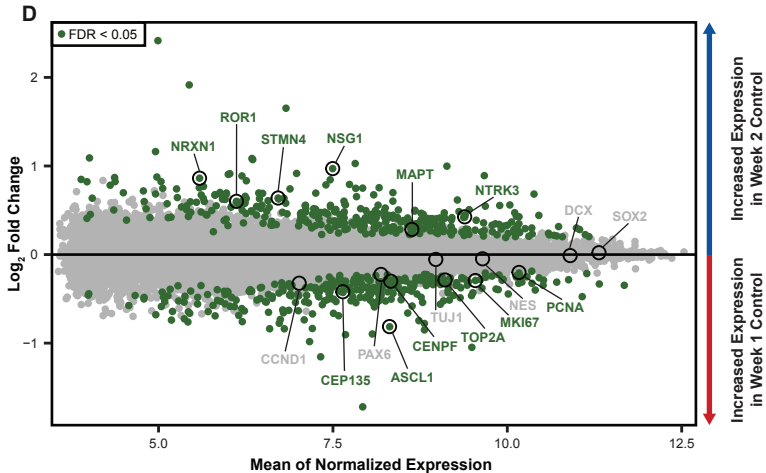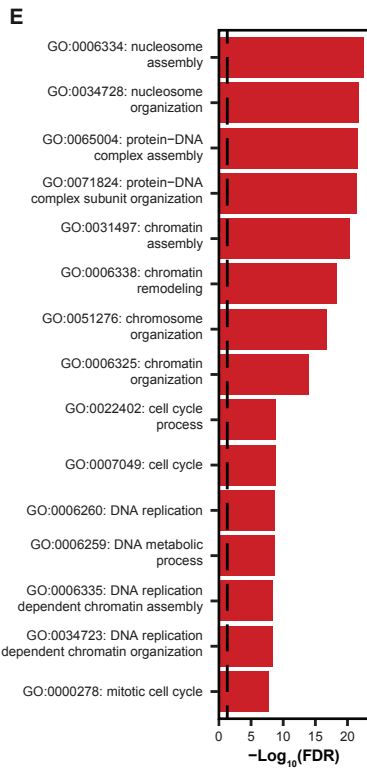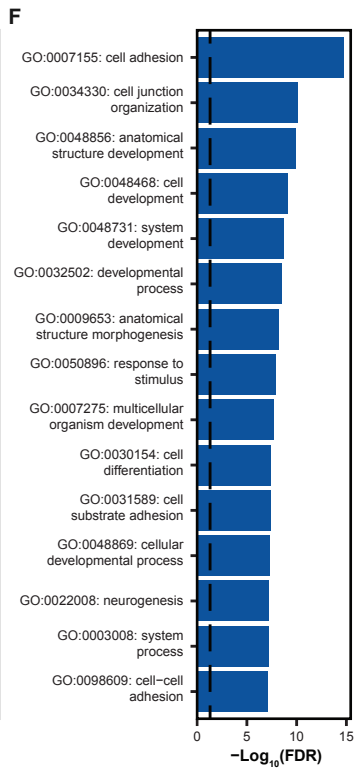

Supplement: supp [file elife-79488-supp-v1.zip]

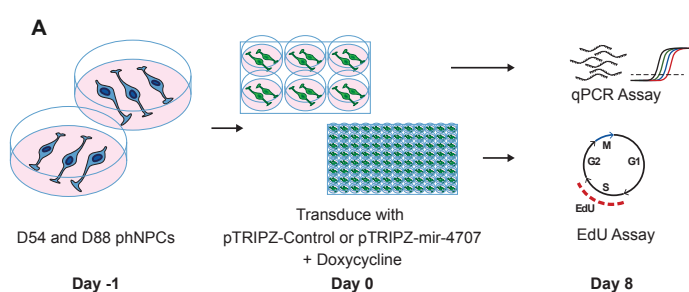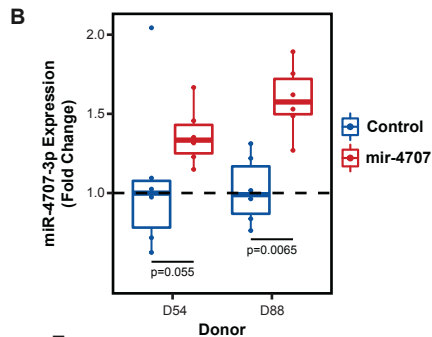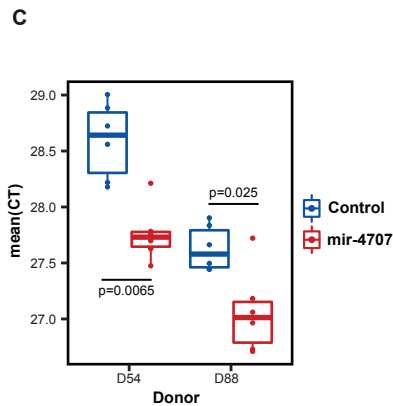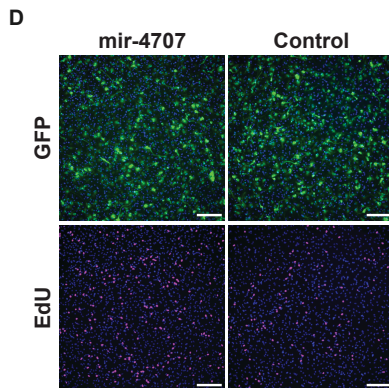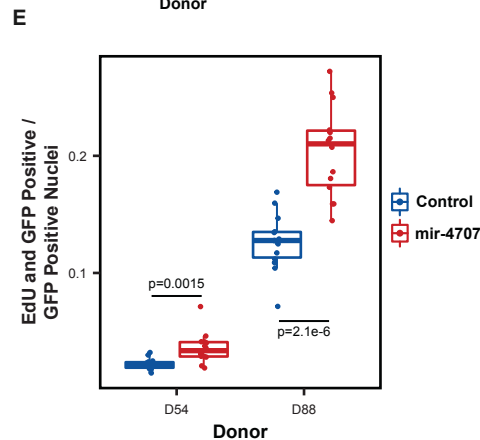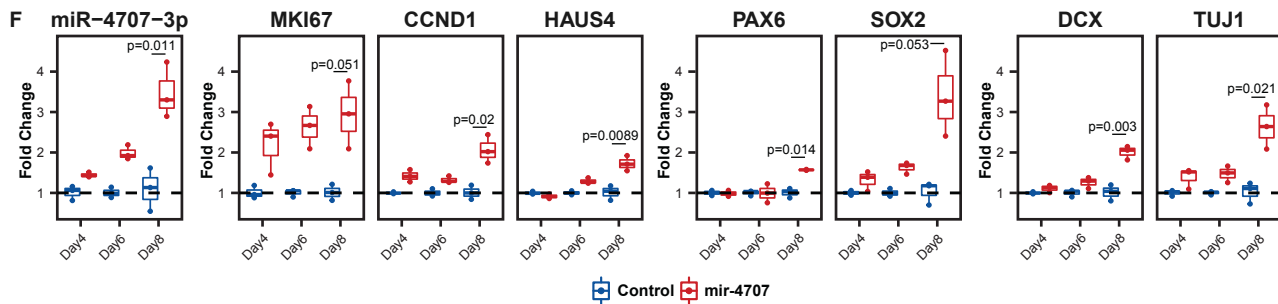

Supplement: supp [file elife-79488-supp-v1.zip]

**A**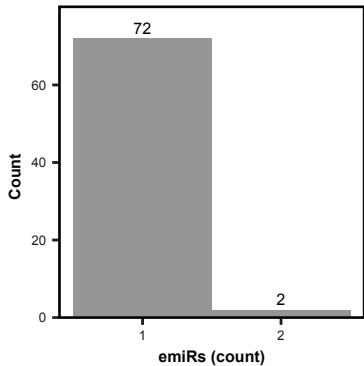**B**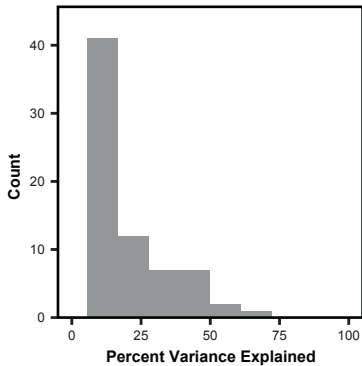

Supplement: supp [file elife-79488-supp-v1.zip]

A

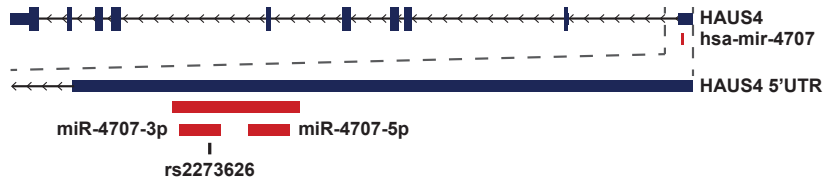

B

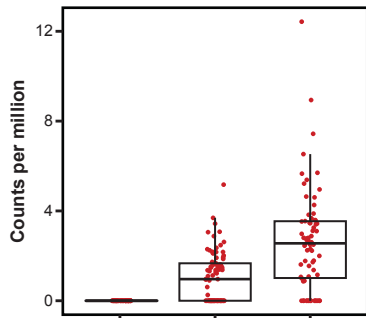

rs4981455 (index variant)

G/G

G/A

A/A

rs2273626 (seed variant)

A/A

A/C

C/C

C

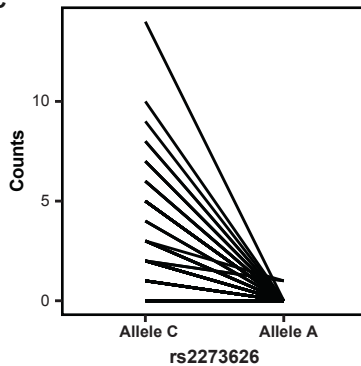

Supplement: supp [file elife-79488-supp-v1.zip]

**A**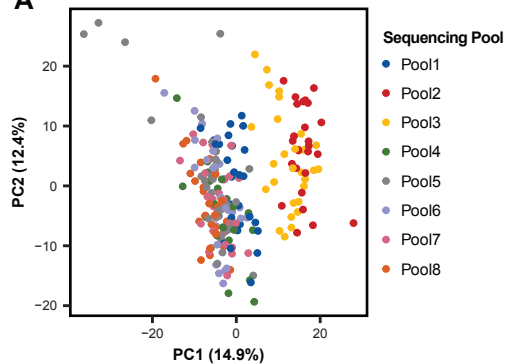**D**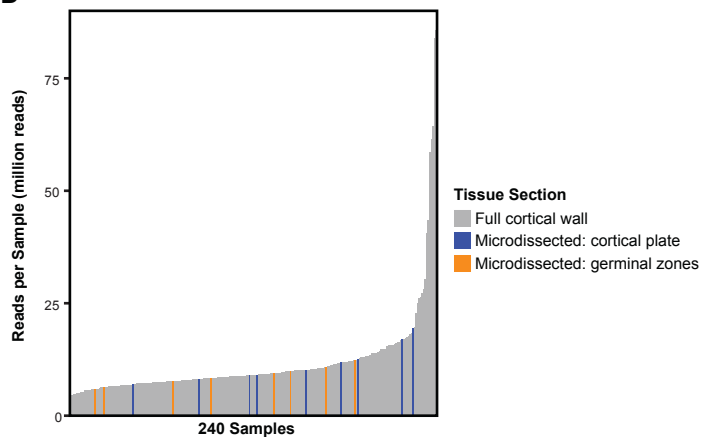**B**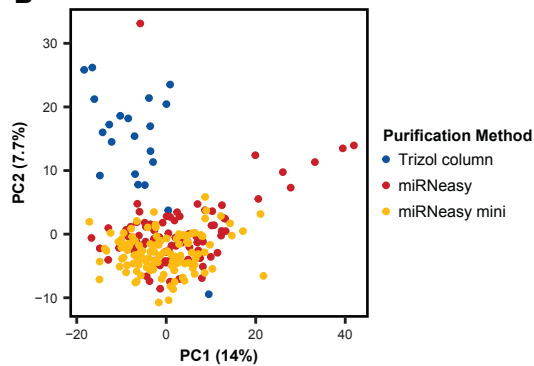**C**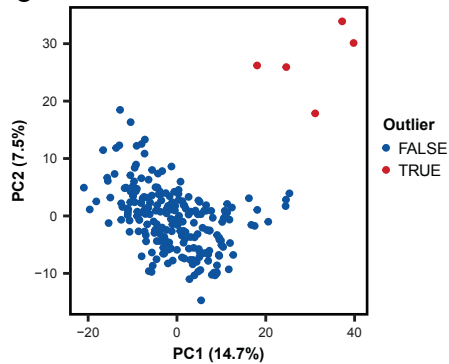**E**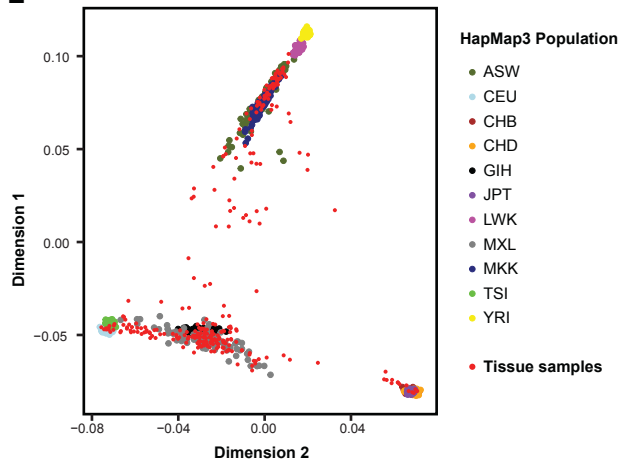

Supplement: supp [file elife-79488-supp-v1.zip]

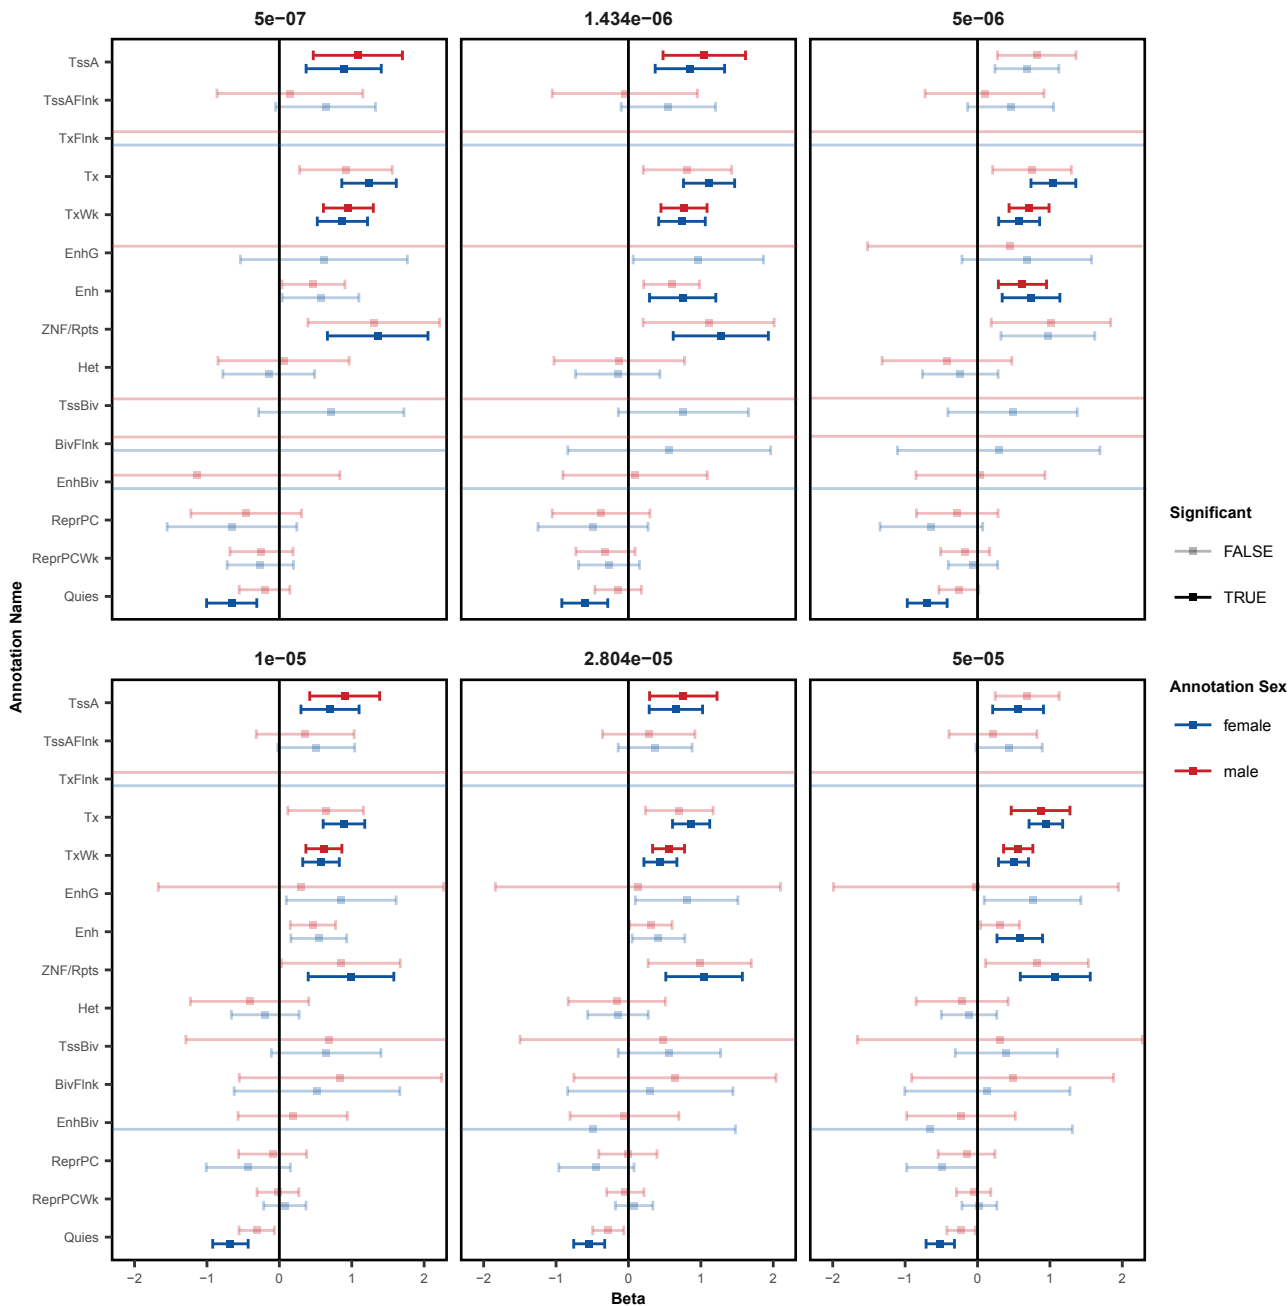

Supplement: supp [file elife-79488-supp-v1.zip]
